# Supplementary material
Source: publisher figshare collection journal article supplement (https://acs.figshare.com/ndownloader/files/4371916)
Supplement: Supplementary file 1 [file 4371916]

## Supporting Information

# Influence of Polyethyleneimine Graftings of Multi-Walled Carbon Nanotubes on their Accumulation and Elimination by and Toxicity to *Daphnia magna*

*Elijah J. Petersen<sup>1</sup>, Roger A. Pinto<sup>2</sup>, Danielle J. Mai<sup>2</sup>, Peter F. Landrum<sup>3</sup>, and*

*Walter J. Weber, Jr.<sup>2</sup>*

<sup>1</sup> Chemical Science and Technology Laboratory, National Institute of Standards and Technology, Gaithersburg, MD 20899

<sup>2</sup> Department of Chemical Engineering, University of Michigan, Ann Arbor, MI 48109

<sup>3</sup> National Oceanic and Atmospheric Administration, Ann Arbor, Michigan 48108

### **Additional immobilization results to verify the validity of the experiments**

Several additional experiments were performed to verify the validity of the immobilization experiments. Control containers with daphnia exposed to un-modified artificial freshwater were utilized during each experiment and consistently yielded less than 4 % overall immobilization, which is acceptable within test guidelines for OECD Guideline 202 [30]. Additionally, immobilization experiments with PEI-MWNTs, PEI- MWNT-Ac, and PEI-MWNT-Suc were repeated and reproducible results were obtained (data not shown). The measured 24-h  $EC_{50}$  value for the potassium dichromate (Figure S1 part a) was  $0.91 \pm 0.08$  mg/L (uncertainty represents the 95 % confidence interval) which is within the range of 0.6 to 2.1 specified for daphnia neonates in OECD Guideline 202 [30].

## Figure Captions

Figure S1: Percent of *Daphnia magna* not immobilized after 24h exposure to potassium dichromate solutions as a reference compound for toxicity. Mean and standard deviation values were calculated from five samples. Uncertainties for EC<sub>50</sub> values represent 95 % confidence intervals. Solid lines are examples of fitted models used to determine EC<sub>50</sub> values.

Figure S2: Percent of *Daphnia magna* not immobilized after 24h exposure to polyethyleneimine (PEI). Mean and standard deviation values were calculated from five samples. Uncertainties for EC<sub>50</sub> values represent 95 % confidence intervals. Solid lines are examples of fitted models used to determine EC<sub>50</sub> values.

Figure S3: Percent of *Daphnia magna* not immobilized after exposure for 24 h (a) and 48 h (b) to various dosages of 3:1 MWNTs, MWNT-PEI, MWNT-PEI-Ac, and MWNT-PEI-Suc. Mean and standard deviation values were calculated from five samples. Dotted lines are examples of fitted models used to determine EC<sub>50</sub> values.

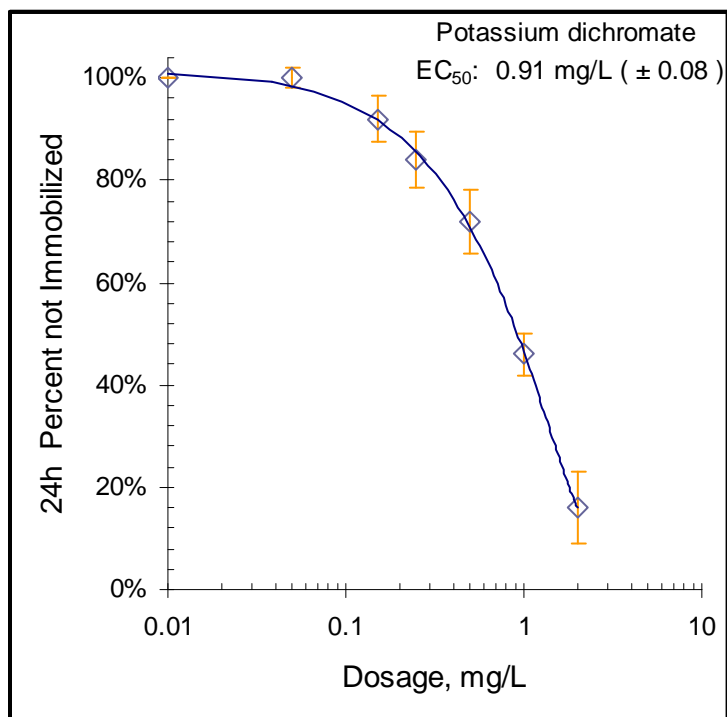

Figure S1

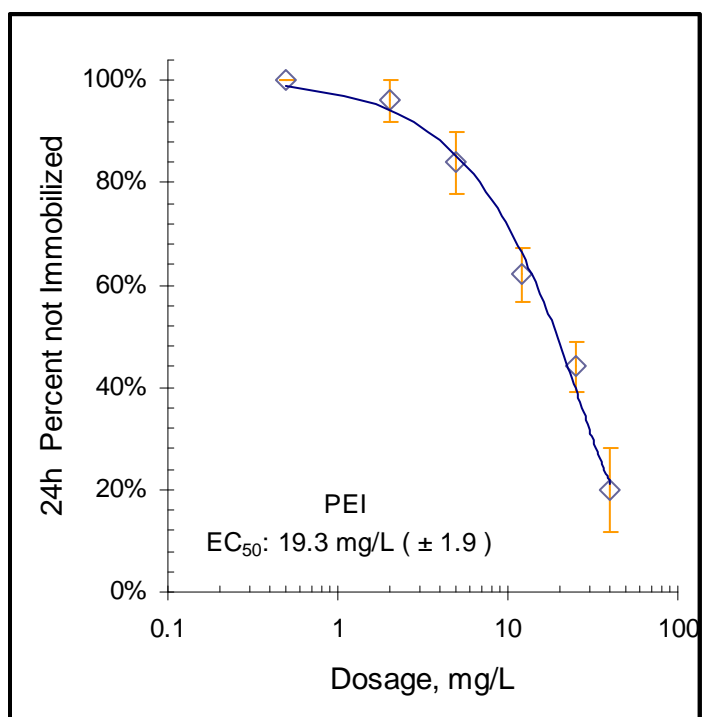

Figure S2

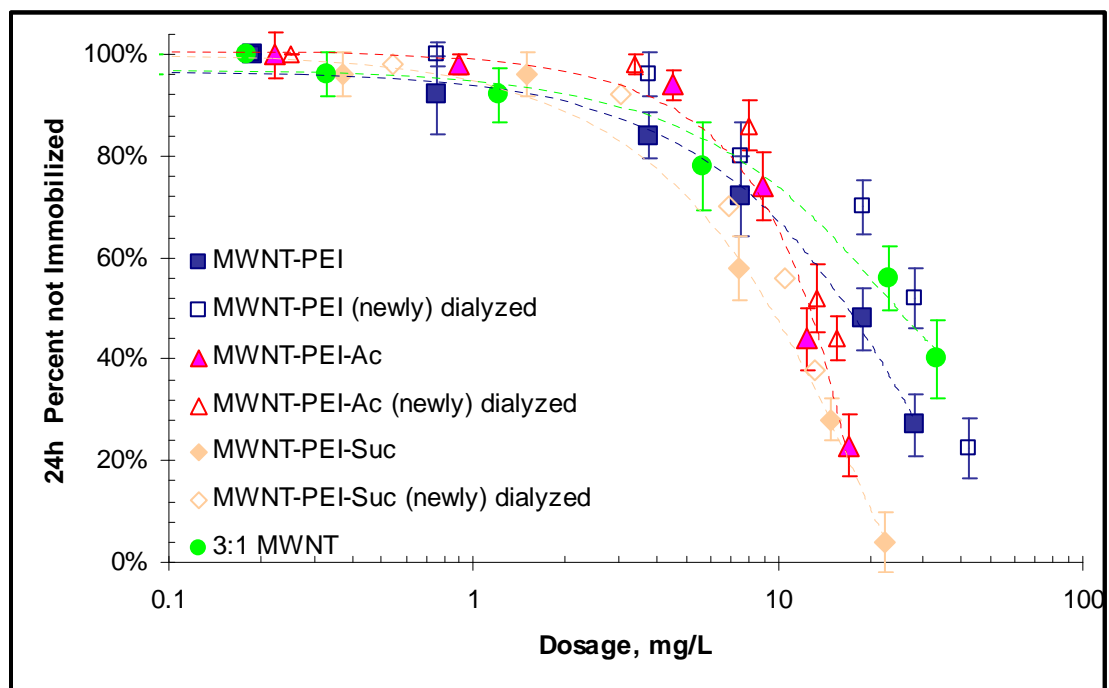

Figure S3a

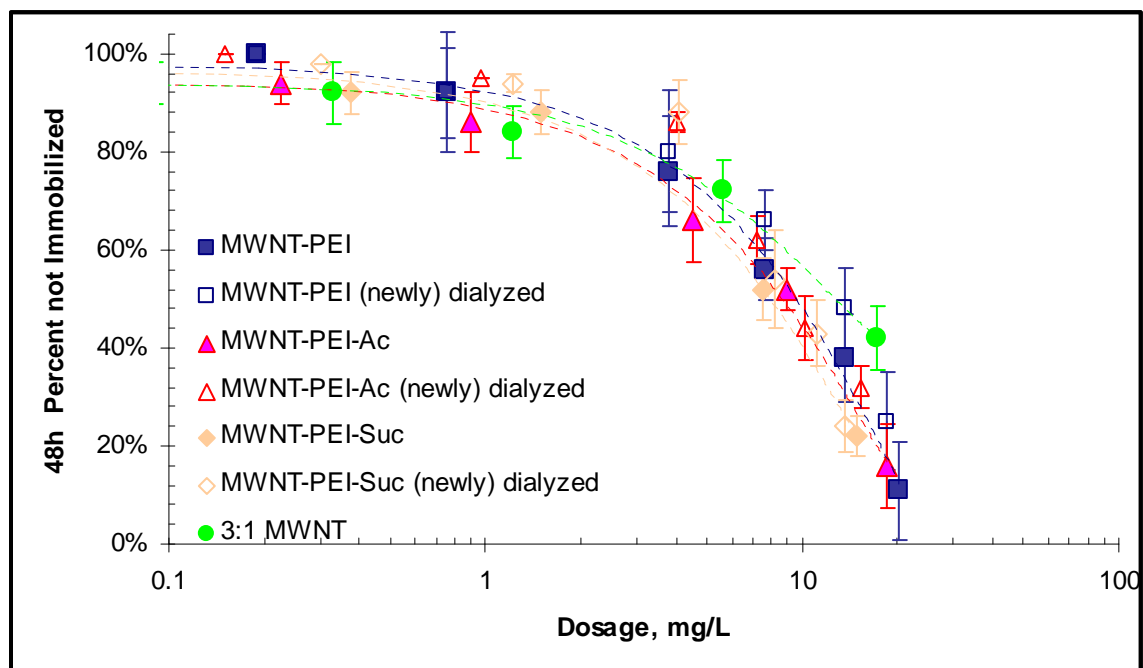

Figure S3b

**Table S1-*Daphnia* body mass increase during carbon nanotube elimination in presence of algae.**

|              | Lower Nanotube Concentration |            | Higher Nanotube Concentration |            |
|--------------|------------------------------|------------|-------------------------------|------------|
|              | 24 h                         | 48 h       | 24 h                          | 48 h       |
| MWNT-PEI     | 33 (12) <sup>a</sup> %       | 30 (11) %  | 33 (8) %                      | 27 (6) %   |
| MWNT-PEI-Ac  | 37 (3) %                     | 55 (8) %   | 36 (5) %                      | 47 (8) %   |
| MWNT-PEI-Suc | 42 (6) %                     | 81 (2) %   | 42 (7) %                      | 55 (13) %  |
| 3:1 MWNT     | 70 (14) %                    | 162 (12) % | 63 (17) %                     | 115 (21) % |

a. Numbers in parentheses indicate standard deviations of triplicates of dry masses of groups of 10 *Daphnia* measured.
